# Supplementary material for: High-throughput sequencing defines donor and recipient HLA B-cell epitope frequencies for prospective matching in transplantation
Source: PubMed Central journal article supplement (PMC8121953; doi:10.1038/s42003-021-01989-3), 2021-05-14
Supplement: 42003_2021_1989_MOESM6_ESM.pdf [file 42003_2021_1989_MOESM6_ESM.pdf]

## Description of Additional Supplementary Files

**File name:** Supplemental Data 1

**Description:** The observed alleles in the study population and their relative frequencies.

**File name:** Supplemental Data 2

**Description:** The observed eplets in the study population and their relative frequencies.

**File name:** Supplemental Data 3

**Description:** Cumulative eplet mismatch scores in the prospective eplet matching simulations.

Scores are averaged over a set of 10 repeated simulations.
